# Supplementary material
Source: PubMed Central journal article supplement (PMC9031798)
Supplement: ehp10077.smcontents.508.pdf [file ehp10077.smcontents.508.pdf]

**Note to readers with disabilities:** *EHP* strives to ensure that all journal content is accessible to all readers. However, some figures and Supplemental Material published in *EHP* articles may not conform to [508 standards](#) due to the complexity of the information being presented. If you need assistance accessing journal content, please contact [ehp508@niehs.nih.gov](mailto:ehp508@niehs.nih.gov). Our staff will work with you to assess and meet your accessibility needs within 3 working days.

### **Supplemental Material**

#### **Prenatal Phthalate Exposure and Child Weight and Adiposity from *in Utero* to 6 Years of Age**

Kelly K. Ferguson, Paige A. Bommarito, Olufunmilayo Arogbokun, Emma M. Rosen, Alexander P. Keil, Shanshan Zhao, Emily S. Barrett, Ruby H.N. Nguyen, Nicole R. Bush, Leonardo Trasande, Thomas F. McElrath, Shanna H. Swan, and Sheela Sathyanarayana

#### **Table of Contents**

**Table S1.** Limits of detection (LOD, ng/mL) and percent of phthalate metabolite concentrations below the LOD for phthalate metabolite concentrations at visits 1 and 3 in the TIDES study population.

**Table S2.** Distributions of child age, weight, and body mass index (BMI) by study visit and by child sex.

**Table S3.** Distribution of the timing of the last attended study visit and total number of study visits by sex.

**Table S4.** Adjusted difference in weight z-scores (95% confidence intervals) per IQR increase in pregnancy average of individual phthalate metabolite biomarkers (n = 780).

**Table S5.** Adjusted difference in BMI z-scores (95% confidence intervals) per IQR increase in pregnancy average of individual phthalate metabolite biomarkers (n = 738).

**Table S6.** Crude difference in weight z-scores (95% confidence intervals) per IQR increase in pregnancy average of individual phthalate metabolite biomarkers (n = 780).

**Table S7.** Crude difference in BMI z-scores (95% confidence intervals) per IQR increase in pregnancy average of individual phthalate metabolite biomarkers (n = 738).

**Table S8.** Adjusted difference in weight z-scores (95% confidence intervals) per IQR increase in pregnancy average of individual phthalate metabolite biomarkers with adjustment for smoking (n = 780).

**Table S9.** Adjusted difference in BMI z-scores (95% confidence intervals) per IQR increase in pregnancy average of individual phthalate metabolite biomarkers with adjustment for smoking (n = 738).

**Table S10.** Adjusted difference in weight z-scores (95% confidence intervals) per IQR increase in pregnancy average of individual phthalate metabolite biomarkers with adjustment for child sex (n = 780).

**Table S11.** Adjusted difference in BMI z-scores (95% confidence intervals) per IQR increase in pregnancy average of individual phthalate metabolite biomarkers with adjustment for child sex (n = 738).

**Table S12.** P-values for likelihood ratio tests comparing primary models with a 2-way interaction (phthalate metabolite\*time of outcome measurement) vs. a 3-way interaction (phthalate metabolite\*time of outcome measurement\*sex).

**Table S13.** Adjusted difference in weight z-scores (95% confidence intervals) per IQR increase in pregnancy average of individual phthalate metabolite biomarkers in females (n = 398) and males (n=382) separately.

**Table S14.** Adjusted difference in BMI z-scores (95% confidence intervals) per IQR increase in pregnancy average of individual phthalate metabolite biomarkers in females (n = 375) and males (n=363) separately.

**Table S15.** Adjusted difference in weight z-scores (95% confidence intervals) per IQR increase in pregnancy average of individual phthalate metabolite biomarkers measured at visit 1 (n = 751) and visit 2 (n = 735) separately.

**Table S16.** Adjusted difference in BMI z-scores (95% confidence intervals) per IQR increase in pregnancy average of individual phthalate metabolite biomarkers measured at visit 1 (n = 722) and visit 3 (n = 697) separately.

**Table S17.** Comparison of demographic characteristics among individuals in the overall sample and individuals who provided data at the age 6 visit.

**Table S18.** Adjusted difference in weight z-scores (95% confidence intervals) per IQR increase in pregnancy average of individual phthalate metabolite biomarkers with IPW of missingness (n = 780).

**Table S19.** Adjusted difference in BMI z-scores (95% confidence intervals) per IQR increase in pregnancy average of individual phthalate metabolite biomarkers with IPW of missingness (n = 738).

**Table S20.** Evaluation of latent class growth analysis model fit for weight z-score growth trajectories from 20 weeks gestation to age six (n = 780).

**Table S21.** Distribution of demographic variables by weight z-score growth trajectory group membership.

**Table S22.** Average phthalate concentrations by weight z-score growth trajectory groupings.

**Table S23.** Adjusted least square mean phthalate (95% confidence interval) concentrations by weight z-score growth trajectory groupings (N=780).

**Table S24.** Evaluation of latent class growth analysis model fit for BMI z-score growth trajectories from birth through early childhood (n = 738).

**Table S25.** Distribution of demographic variables by BMI z-score growth trajectory group membership (n = 738).

**Table S26.** Adjusted least square mean phthalate (95% confidence interval) concentrations by BMI z-score growth trajectory groupings (n = 738).

**Figure S1.** Spearman correlation coefficients between specific-gravity corrected phthalate metabolite measurements from visits 1 and 3.

**Figure S2.** Predicted mean (95% C) trajectories for BMI z-scores from birth to 6 years estimated using group-based trajectory modeling.
